# Supplementary material
Source: Research Square preprint supplement (doi:10.21203/rs.3.rs-9545141/v1)
Supplement: Supplementary file 1 [file 89d142e136b06d61e9c4e53b.docx]

**Insects as biosamplers of fine and ultrafine particles in urban environments**

Meza-Figueroa D.1,7*, Berrellez-Reyes, F.2,7, Valencia-Meza, A.1, Valdez-Ojeda, L. F.3, González-Grijalva, B.1,7, Schiavo B.4,7, Villarreal-Cantú, P.5, Ortega-Rosas, C.I.6,7

1 Departamento de Geología, Universidad de Sonora. Rosales y Encinas, Centro, Hermosillo, Sonora, México 83000

2 Secretaría de Ciencia, Humanidades, Tecnología e Innovación, SECIHTI. Av. Insurgentes Sur 1582, Crédito Constructor, Benito Juárez, Ciudad de México 03940

3 Red de Ecoetología, Instituto de Ecología A.C. (INECOL) Carretera antigua a Coatepec 351, Col. El Haya, Xalapa, Veracruz, México 91073

4 Instituto de Geofísica, Universidad Nacional Autónoma de México, Mexico City, Mexico

5 Procuraduría Ambiental del Gobierno del Estado de Sonora, PROAES. Cuernavaca 54, San Benito, Hermosillo, Sonora, México 83190

6 Licenciatura en Ecología, Universidad Estatal de Sonora, Ley Federal del Trabajo SN. Col. Apolo, Hermosillo, Sonora, México

7 Laboratorio Nacional de Atmósfera y Clima LanCAC, Secretaría de Ciencia, Humanidades, Tecnología e Innovación, SECIHTI. Av. Insurgentes Sur 1582, Crédito Constructor, Benito Juárez, Ciudad de México 03940

**Supplementary Material**


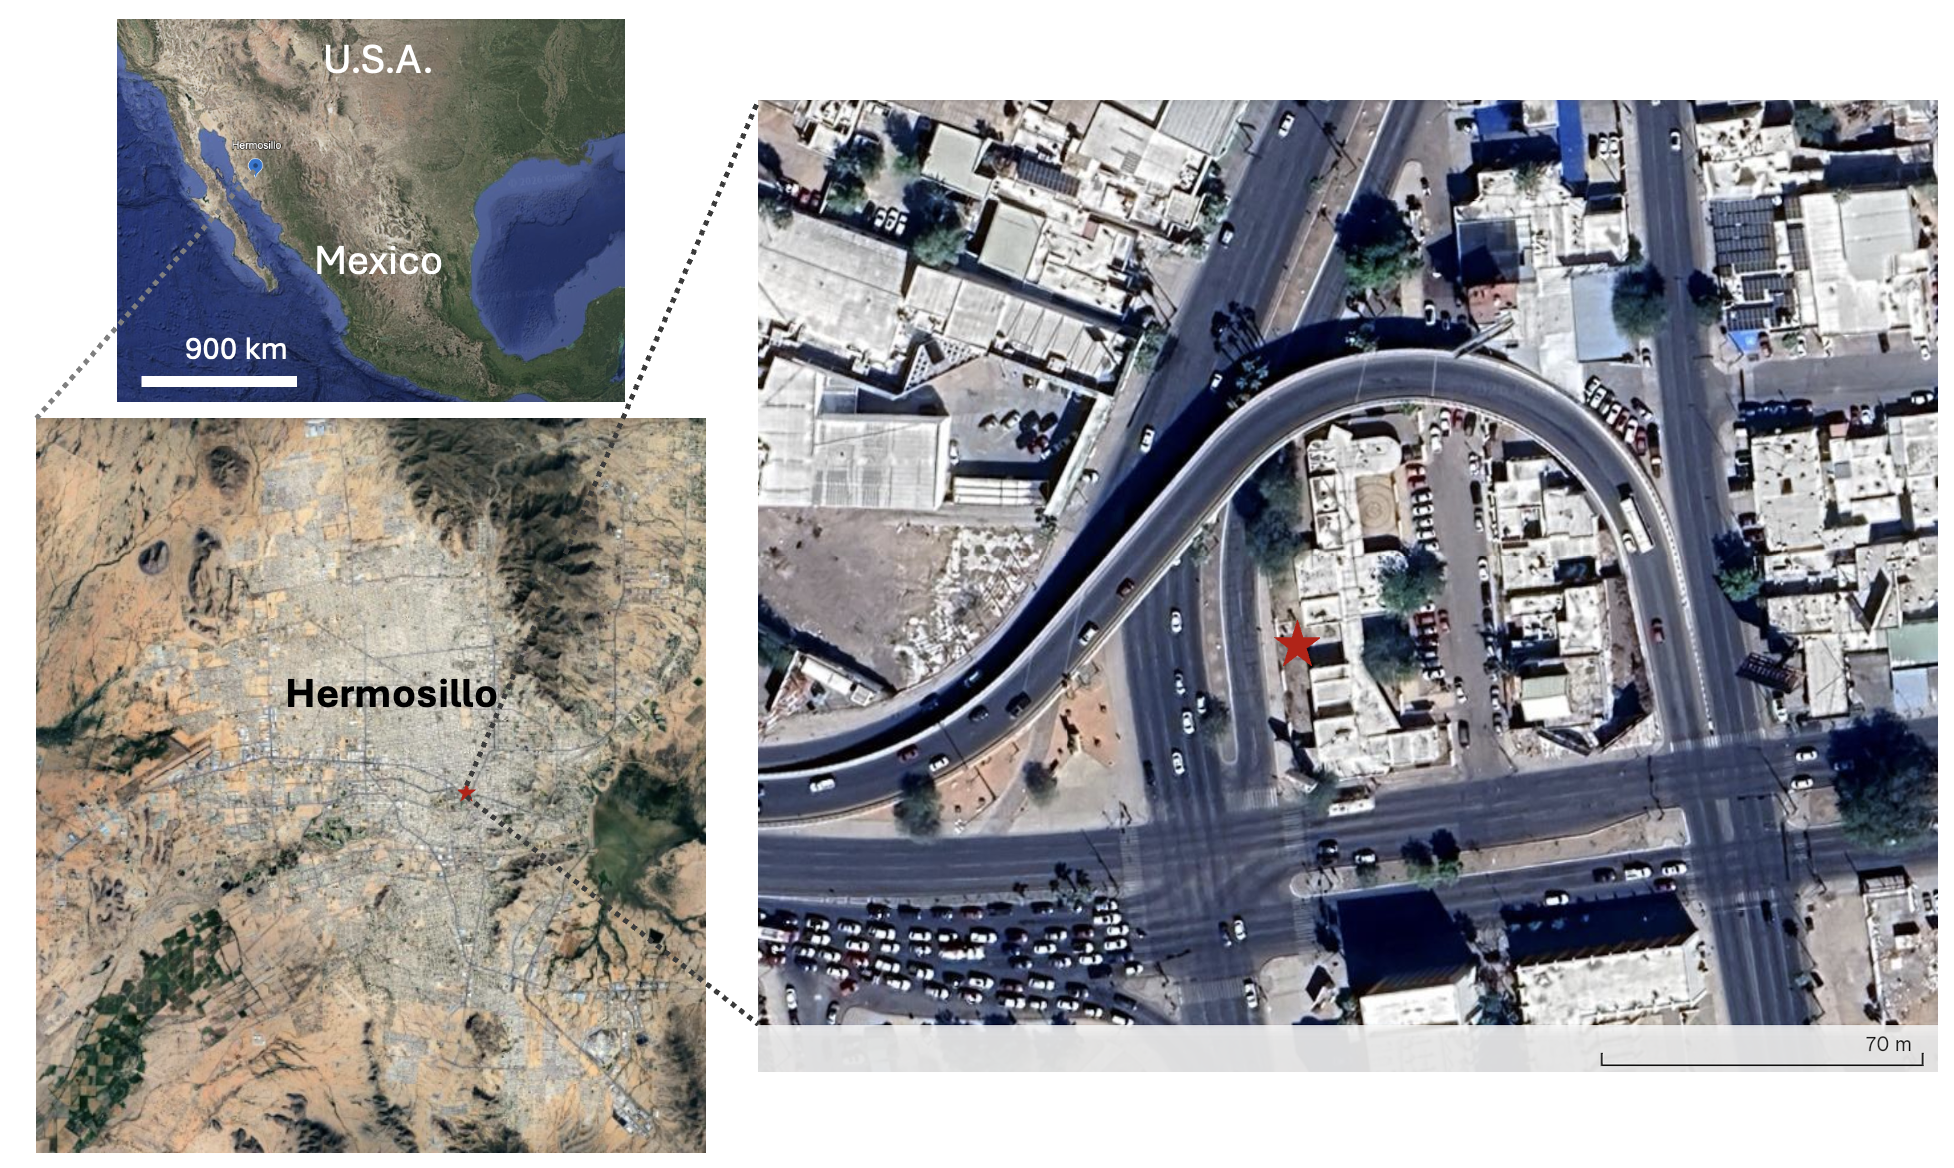


**Figure S1.** Location map of study site (shown as the red star).


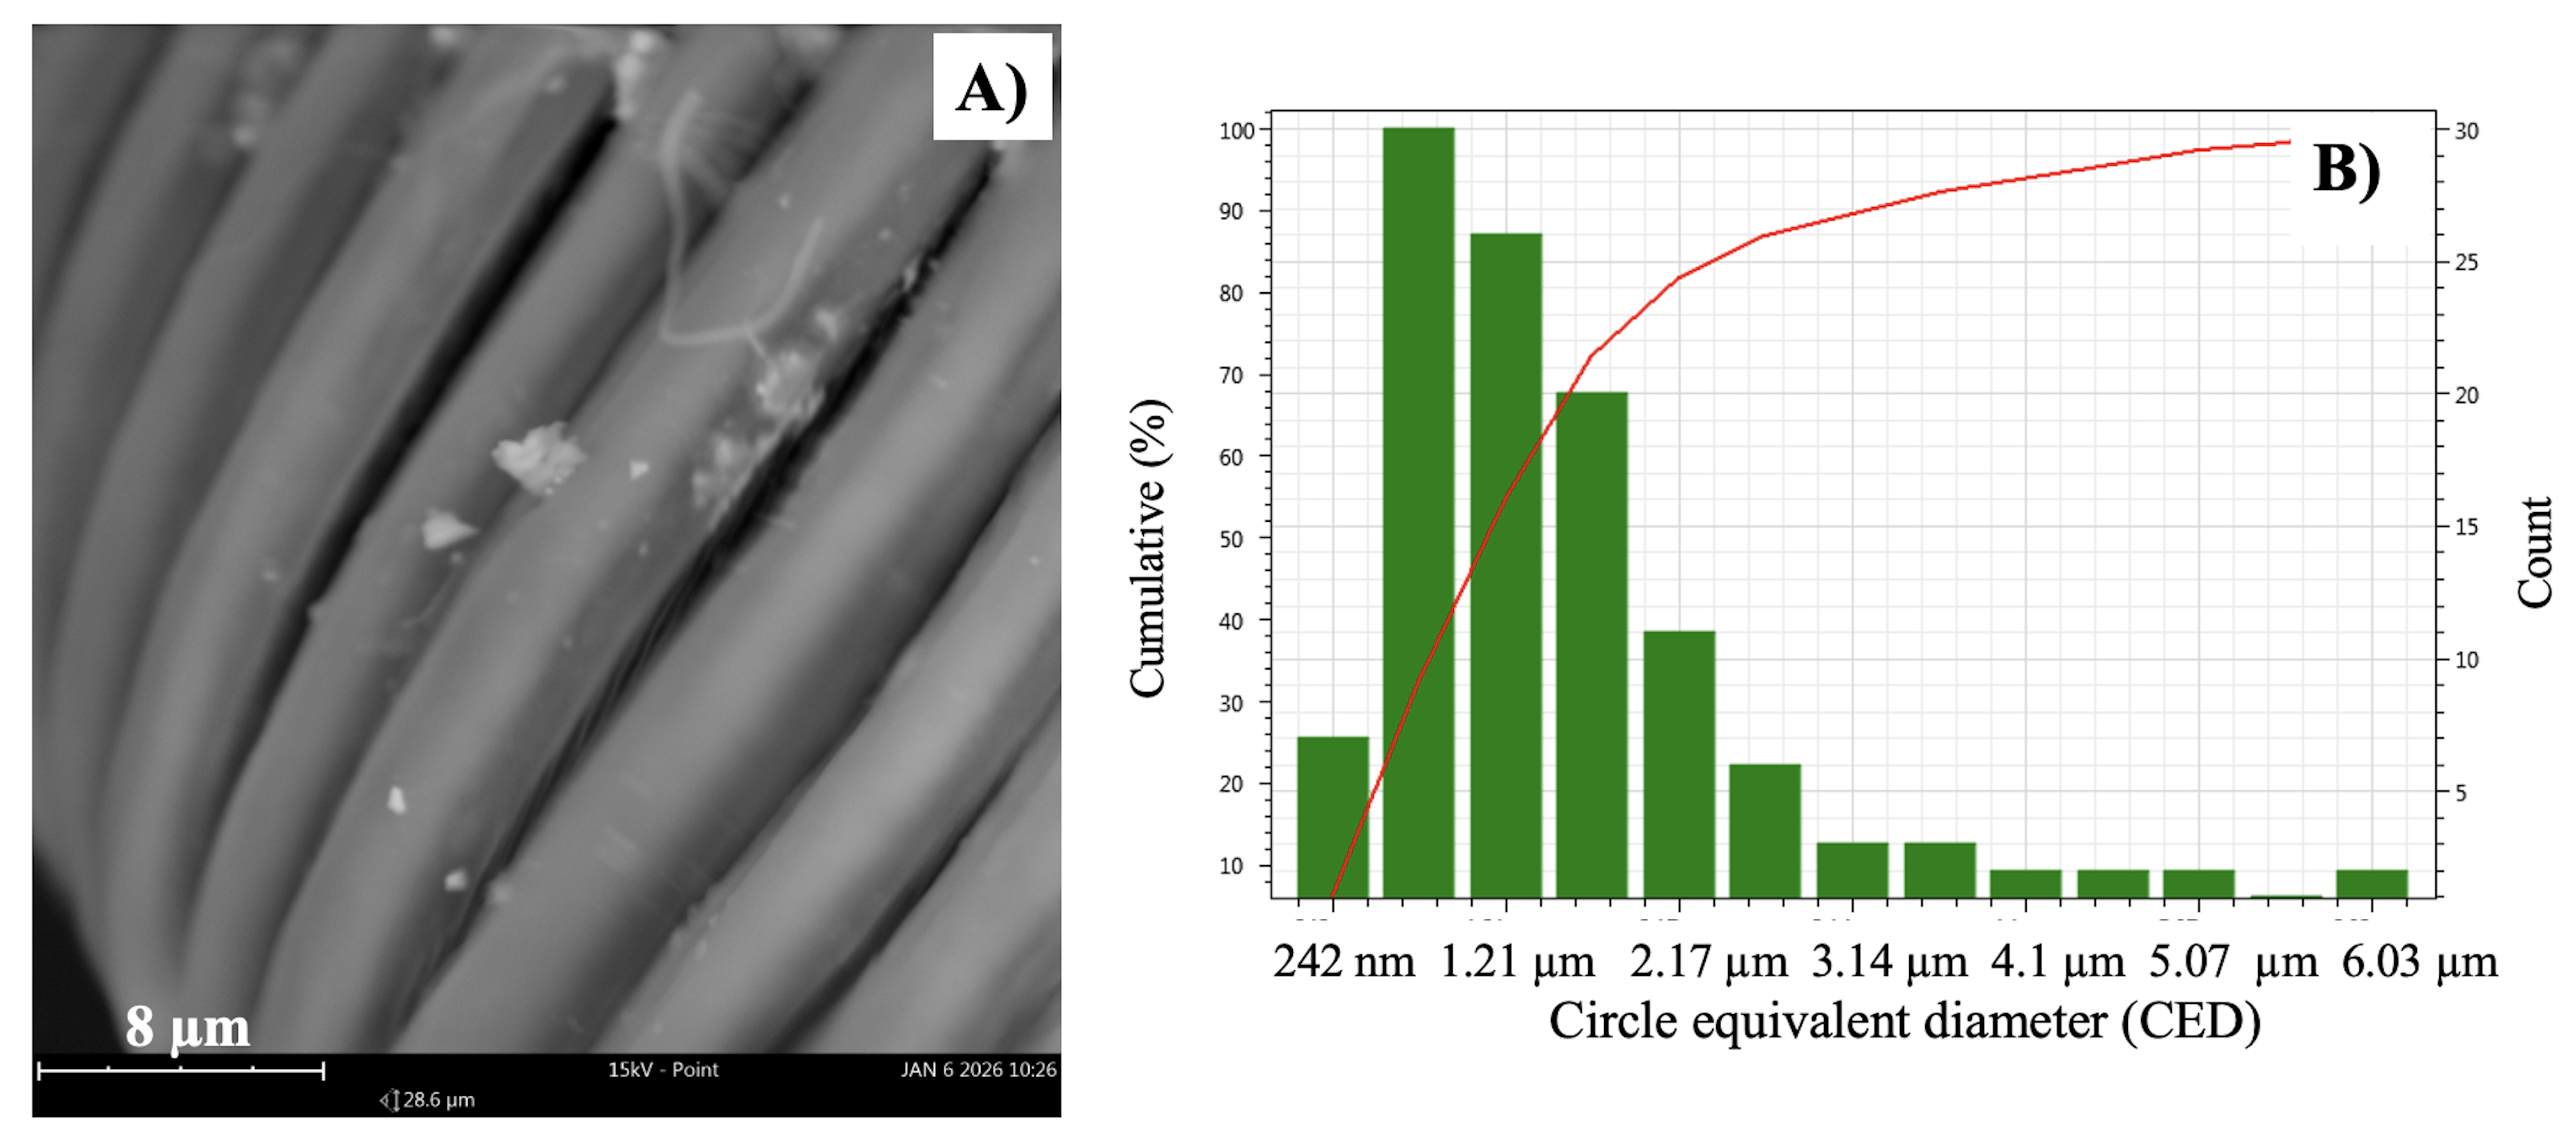


**Figure S2.** A)SEM-EDS image showing particles adhering to the legs of *Apis*. B) particle size distribution on the legs of *Apis.*


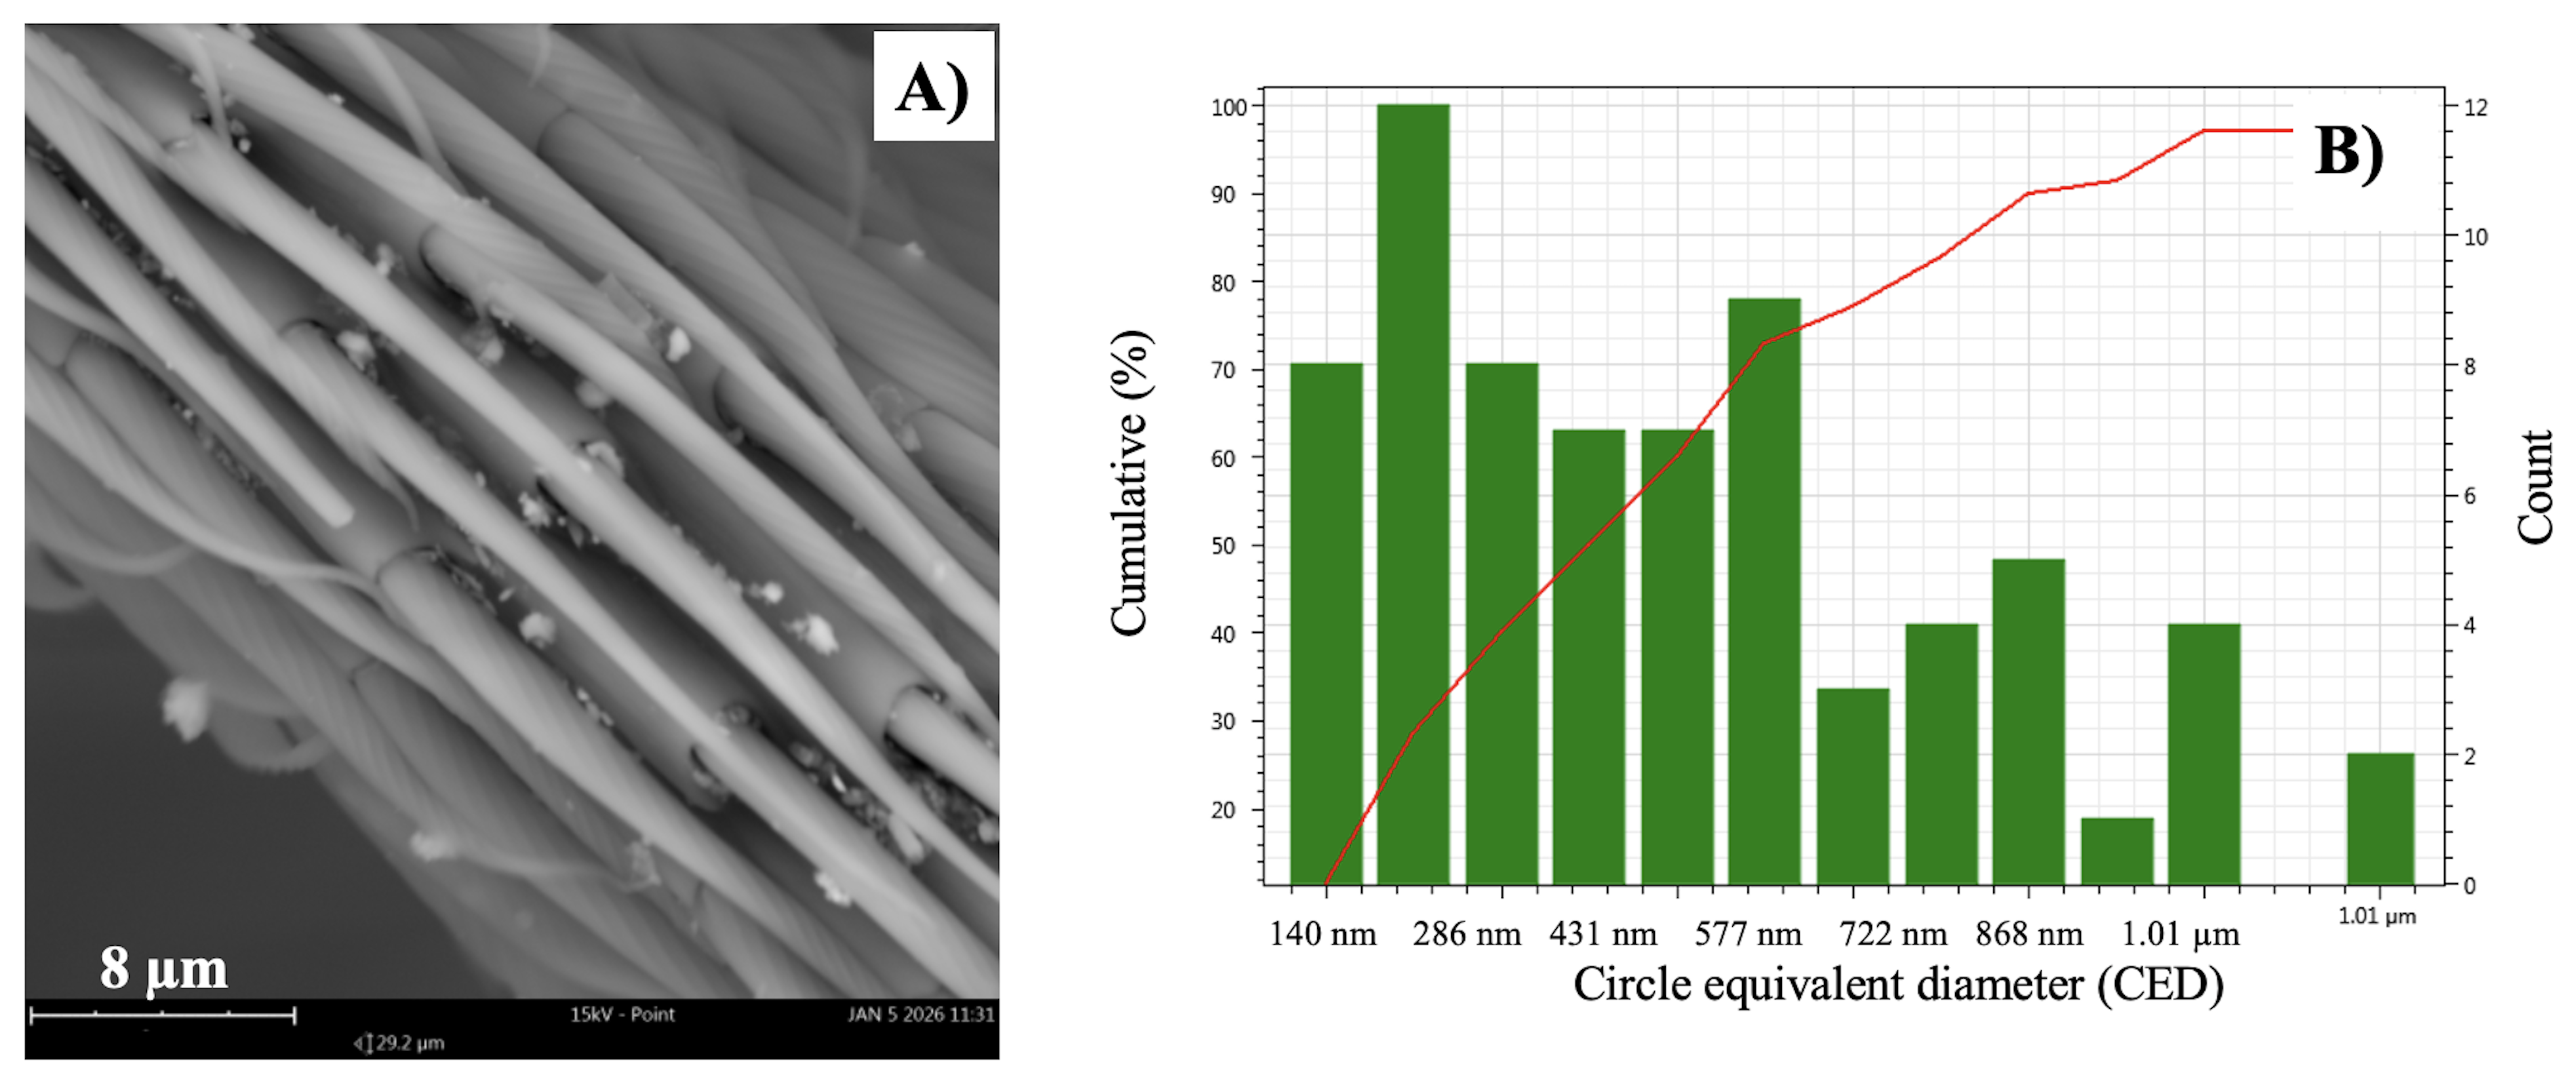


**Figure S3.** A)SEM-EDS image showing particles adhering to the legs of *Cerceris*. B) particle size distribution on the legs of *Cerceris.*

**Table S1.** Particle properties based on 3 images with a total of 115 particles found in legs from *Apis*

| **Properties weighted by volume** | | | **Properties weighted by count** | | |
| --- | --- | --- | --- | --- | --- |
| Property | Median | Average | Property | Median | Average |
| Circle equivalent diameter | 4.85 µm | 4.55 µm | Circle equivalent diameter | 1.49 µm | 1.92 µm |
| Major axis | 5.56 µm | 6.25 µm | Major axis | 1.83 µm | 2.46 µm |
| Minor axis | 3.51 µm | 3.46 µm | Minor axis | 1.2 µm | 1.54 µm |
| Circumference | 18.5 µm | 18.6 µm | Circumference | 4.93 µm | 6.98 µm |
| Convex hull | 17.7 µm | 17.4 µm | Convex hull | 4.93 µm | 6.76 µm |
| Circumscribed circle equivalent | 6.57 µm | 7.23 µm | Circumscribed circle equivalent | 1.92 µm | 2.73 µm |
| Area | 18.5 µm2 | 18.3 µm2 | Area | 1.75 µm2 | 4.15 µm2 |
| Volume by area | 59.9 µm3 | 67.3 µm3 | Volume by area | 1.74 µm3 | 10.3 µm3 |
| Pixel count | 2587 | 2584 | Pixel count | 332 | 796 |
| Aspect ratio | 0.637 | 0.619 | Aspect ratio | 0.682 | 0.671 |
| Circularity | 0.696 | 0.670 | Circularity | 0.866 | 0.835 |
| Convexity | 0.952 | 0.949 | Convexity | 1 | 0.983 |
| Elongation | 0.362 | 0.381 | Elongation | 0.318 | 0.329 |
| Grayscale | 155 | 164 | Grayscale | 155 | 159 |

**Table S2.** Particle properties based on 3 images with a total of 70 particles found in legs from *Cerceris*

| **Properties weighted by volume** | | | **Properties weighted by count** | | |
| --- | --- | --- | --- | --- | --- |
| Property | Median | Average | Property | Median | Average |
| Circle equivalent diameter | 791 nm | 779 nm | Circle equivalent diameter | 435 nm | 471 nm |
| Major axis | 1.1 µm | 1.05 µm | Major axis | 546 nm | 620 nm |
| Minor axis | 585 nm | 588 nm | Minor axis | 330 nm | 366 nm |
| Circumference | 3.04 µm | 2.86 µm | Circumference | 1.49 µm | 1.69 µm |
| Convex hull | 2.98 µm | 2.8 µm | Convex hull | 1.48 µm | 1.66 µm |
| Circumscribed circle equivalent | 1.17 µm | 1.15 µm | Circumscribed circle equivalent | 619 nm | 675 nm |
| Area | 0.49 µm2 | 0.52 µm2 | Area | 0.15 µm2 | 0.22 µm2 |
| Volume by area | 0.26 µm3 | 0.31 µm3 | Volume by area | 0.04 µm3 | 0.10 µm3 |
| Pixel count | 2688 | 2816 | Pixel count | 932 | 1268 |
| Aspect ratio | 0.599 | 0.583 | Aspect ratio | 0.638 | 0.636 |
| Circularity | 0.769 | 0.749 | Circularity | 0.825 | 0.82 |
| Convexity | 0.977 | 0.98 | Convexity | 1 | 0.99 |
| Elongation | 0.396 | 0.417 | Elongation | 0.362 | 0.364 |
| Grayscale | 149 | 151 | Grayscale | 135 | 142 |
